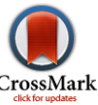

# Brain Intraventricular Injection of Amyloid- $\beta$ in Zebrafish Embryo Impairs Cognition and Increases Tau Phosphorylation, Effects Reversed by Lithium

Laura Roesler Nery<sup>1</sup>, Natalia Silva Eltz<sup>1</sup>, Cristiana Hackman<sup>1</sup>, Raphaela Fonseca<sup>1</sup>, Stefani Altenhofen<sup>2</sup>, Heydi Noriega Guerra<sup>3</sup>, Vanessa Morais Freitas<sup>3</sup>, Carla Denise Bonan<sup>2</sup>, Monica Ryff Moreira Roca Vianna<sup>1\*</sup>

**1** ZebLab & Laboratório de Biologia e Desenvolvimento do Sistema Nervoso, Faculdade de Biociências, Pontifícia Universidade Católica do Rio Grande do Sul, Porto Alegre, Rio Grande do Sul, Brazil, **2** ZebLab & Laboratório de Neuroquímica e Psicofarmacologia, Faculdade de Biociências, Pontifícia Universidade Católica do Rio Grande do Sul, Porto Alegre, Rio Grande do Sul, Brazil, **3** Department of Cell and Developmental Biology, Institute of Biomedical Sciences, University of Sao Paulo, Sao Paulo, Brazil

## Abstract

Alzheimer's disease (AD) is a devastating neurodegenerative disorder with no effective treatment and commonly diagnosed only on late stages. Amyloid- $\beta$  (A $\beta$ ) accumulation and exacerbated tau phosphorylation are molecular hallmarks of AD implicated in cognitive deficits and synaptic and neuronal loss. The A $\beta$  and tau connection is beginning to be elucidated and attributed to interaction with different components of common signaling pathways. Recent evidences suggest that non-fibrillary A $\beta$  forms bind to membrane receptors and modulate GSK-3 $\beta$  activity, which in turn phosphorylates the microtubule-associated tau protein leading to axonal disruption and toxic accumulation. Available AD animal models, ranging from rodent to invertebrates, significantly contributed to our current knowledge, but complementary platforms for mechanistic and candidate drug screenings remain critical for the identification of early stage biomarkers and potential disease-modifying therapies. Here we show that A $\beta$ 1–42 injection in the hindbrain ventricle of 24 hpf zebrafish embryos results in specific cognitive deficits and increased tau phosphorylation in GSK-3 $\beta$  target residues at 5dpf larvae. These effects are reversed by lithium incubation and not accompanied by apoptotic markers. We believe this may represent a straightforward platform useful to identification of cellular and molecular mechanisms of early stage AD-like symptoms and the effects of neuroactive molecules in pharmacological screenings.

**Citation:** Nery LR, Eltz NS, Hackman C, Fonseca R, Altenhofen S, et al. (2014) Brain Intraventricular Injection of Amyloid- $\beta$  in Zebrafish Embryo Impairs Cognition and Increases Tau Phosphorylation, Effects Reversed by Lithium. PLoS ONE 9(9): e105862. doi:10.1371/journal.pone.0105862

**Editor:** Jerson Laks, Federal University of Rio de Janeiro, Brazil

**Received:** November 4, 2013; **Accepted:** July 29, 2014; **Published:** September 4, 2014

**Copyright:** © 2014 Nery et al. This is an open-access article distributed under the terms of the Creative Commons Attribution License, which permits unrestricted use, distribution, and reproduction in any medium, provided the original author and source are credited.

**Funding:** MRV, RF, NES and CDB received CNPq fellowships, LRN and SA were supported by CAPES and CS by FAPERGS; This work was supported by CNPq(305060/2009-0, 567483/2008-8) and DECIT/SCTIE-MS/CNPq-FAPERGS (10/0036-5 700545/2008-PRONEX). The funders had no role in study design, data collection and analysis, decision to publish, or preparation of the manuscript.

**Competing Interests:** The authors have declared that no competing interests exist.

\* Email: monica.vianna@pucrs.br

## Introduction

Alzheimer's disease (AD) is the most prevalent cause of dementia currently affecting 30 million individuals and expected to quadruplicate until 2050 [1]. AD symptoms include progressive cognitive decline due to synaptic and neuronal deterioration and the lack of effective treatments results in extensive care with elevated costs for several years [1], inexorably culminating in death. Despite abundant information about altered cellular events in sporadic AD, its effective treatment depends on understanding sequential disease mechanisms in order to identify potential treatment-targets in early stages.

AD is characterized by deposition and aggregation of Amyloid- $\beta$  (A $\beta$ ) protein on the extracellular space [1] [2] while the microtubule-associated tau protein becomes abnormally phosphorylated, disrupts cytoskeletal organization and accumulates on toxic neurofibrillary tangles in the cytosol [3].

Recent studies support new features of the non-fibrillary and soluble A $\beta$  peptide forms before aggregation that are believed to be prevalent in initial disease stages [4] [5] [6]. A correlation

between soluble A $\beta$  and increased tau protein phosphorylation has been demonstrated [7] [8] [9] [10]. Tau phosphorylation (tau-p) can be reversed by pharmacological inhibition of specific tau-kinases such as Glycogen synthase kinase-3 $\beta$  (GSK-3 $\beta$ ) in rodents [11] [12] and AD patients [13]. The missing link between A $\beta$  and tau accumulation could be the A $\beta$  soluble peptide forms that bind to membrane receptors and modulate GSK-3 $\beta$  activity [6] [7].

A better understanding of AD progression and its cellular and molecular mechanisms depends on animal models that mimic specific disease aspects. Intracerebral infusion of A $\beta$  protein in rodents has contributed significantly to understanding the AD underlying machinery [14] [15] [16]. Complementary models to study molecular aspects of AD include the fruit fly *Drosophila* [17] and the nematode *C. elegans* [18]. However, the need of complementary platforms for mechanistic and candidate drug screenings remains. Zebrafish has emerged in the last decade as an advantageous model organism for high-throughput pharmacological screenings of neuroactive compounds [19] [20] [21] [22] and recently shown to share 84% of the genes known to be associated with human diseases [23], including those related to AD [20].

In this context, we propose a complementary model to further dissect the pathological effects of soluble A $\beta$  and simultaneously screen for potential neuroprotective molecules. Our model is based on the hindbrain ventricle injection of the A $\beta$ 1-42 peptide in 24 hpf zebrafish embryos and results in specific behavioral and molecular effects that resemble early stage AD features. Specific cognitive deficits and tau-phosphorylation in residues associated to early AD stages were reversed by lithium chloride, a GSK-3 $\beta$  inhibitor.

## Materials and Methods

### Animals

Adult wild type zebrafish were kept and bred according to standard procedures in an automated re-circulating system (Tecniplast) at a density of 1.5 fish per liter with a constant light-dark cycle (14–10 h) [24]. For breeding, females and male (1:2) placed in breeding tanks (Tecniplast) overnight were separated by a transparent barrier that was removed after lights went on in the following morning. Embryos were collected after 15 min and transferred to sterile 6-well cell culture plates (20 embryos per well) kept in incubators at 28.5°C and controlled 14:10 hours light-dark cycle. Embryos and larvae had their mortality and general morphology daily monitored under an inverted stereomicroscope (Nikon).

### Ethics Statement

All protocols were approved by the Institutional Animal Care Committee (CEUA-PUCRS, permit number 0107/12), followed the Brazilian legislation (no.11.794/08) and conducted according to the Canadian Council on Animal Care guidelines for the use of fish in research [25].

### Treatment and Brain Ventricle Injection

Embryos were treated with system water (RO water equilibrated with Instant Ocean salts - H<sub>2</sub>O) or 100  $\mu$ M Lithium Chloride (LiCl) (Synth) [26] diluted in system water from 1 hour post-fertilization (hpf) until 5 days post-fertilization (dpf) (Figure 1A). Medium was daily replaced and controlled for pH.

At 24 hpf all embryos had their chorion removed for the brain ventricle injection procedure according to Gutzman and Sive [27]. Embryos were anesthetized with Tricaine (Sigma Aldrich) and placed in wells on 0.75%-agar coated dishes under the stereomicroscope so that the brain ventricle was visible and the embryo unmoving (Figure 1A). The microinjection was performed using a micromanipulator (Narishige) attached to a Picoliter injection pump (Warner Instruments). The injection needle was placed on the roof plate of the hindbrain and 5–10 nl of a 10  $\mu$ M A $\beta$ 1-42 in 1% DMSO 0.5% Phenol Red Phosphate Buffered Saline (PBS) solution (A $\beta$ ) was injected while control group animals received the equivalent 1% DMSO 0.5% Phenol Red in PBS vehicle (veh). In less than 10 minutes each animal was returned to the incubator. In addition to the resulting H<sub>2</sub>O-veh, LiCl-veh, H<sub>2</sub>O-A $\beta$ , LiCl-A $\beta$ , additional control groups of uninjected animals treated with water (H<sub>2</sub>O- $\emptyset$ ) or LiCl (LiCl- $\emptyset$ ) composed final 6 experimental groups.

The A $\beta$ 1-42 peptide (Sigma Aldrich) was prepared following manufacturer instructions in DMSO 100% to a final concentration of 1000  $\mu$ M and diluted to the final 10  $\mu$ M according to Cunvong et al. [28]. To prevent A $\beta$  aggregation into the fibrillary form, the solution was maintained at a maximum temperature of 28°C and the pH was adjusted to 7.0. Diluted A $\beta$ 1-42 was “rantrue” in SDS-PAGE gel and a band of an approximately molecular weight of 40 kDa was observed [10].

### Locomotor behavior

5dpf larvae from all experimental groups (N = 10 in triplicates) were individually placed in a 24-well plate filled with 3 ml of system water for locomotory performance analysis during a 5-min session following 1-min acclimation. The performance was video recorded using a digital HD webcam (Logitech) for automated analysis (ANYmaze, Stoelting). Total distance travelled, mean speed, time mobile and absolute turn angle were considered the main parameters of exploration of a new environment.

### Bouncing-Ball Avoidance behavior

After the exploratory evaluation, larvae were placed in 6-well plate (5 larvae per well, N = 10 in triplicates) over a LCD monitor for cognitive ability and avoidance responses to a visual stimulus (a 1.35 cm diameter red bouncing ball) in a protocol adapted from Pelkowski et al. [29] during a 5-min session following 2-min acclimation. The red bouncing ball travelled from left to right over a straight 2 cm trajectory on half of the well area (stimuli area) (Figure 1A) which animals avoided by swimming to the other non-stimuli half of the well. The number of larvae on the non-stimuli area during the 5-min session was considered indicative of their cognitive ability.

### Western Blot

Euthanized 5dpf larvae (Figure 1A) had their encephalon dissected (pool of 20 animals, N = 3 in triplicates) and stored at –80°C in protease inhibitor cocktail (Sigma Aldrich) until homogenization with RIPA (Sigma Aldrich) and protein separation on 12% SDS-polyacrylamide gel with sample buffer (0.025% BPB). Proteins were transferred to a nitrocellulose membrane and blocked with 5% bovine serum albumin on TBST. Primary Antibodies were diluted on the blocking solution at the following concentrations: Rb- $\beta$ -actin (Anaspec; 1:1000); Ms-Phospho-PHF-tau pSer202/Thr205 AT8 (Pierce; 1:500); Rb-p53 (Anaspec; 1:1000); Rb-bax (Anaspec; 1:750) and Rb-caspase-8 (Anaspec; 1:750); and incubated overnight, washed three times with TBST and incubated for 1 hour with secondary antibody diluted in 5% Albumin in TBST at the concentrations of Goat-anti-Rabbit IgG (Sigma Aldrich; 1:2000) and Goat-anti-Mouse IgG (Abcam; 1:2000). Membranes were washed with TBST, incubated with ECL (Abcam) and scanned for further densitometric quantification of replicated gels using the software Carestream. After exposure, membranes were washed in TBST to remove ECL solution and antibodies were striped out by dehybridization with (2% SDS, 50 mM Tris pH 6.8 and 100 mM  $\beta$ -mercaptoethanol), and incubated with other antibodies using the same actin control. Total protein levels were normalized according to each sample's  $\beta$ -actin levels.

### Real time PCR

RNA isolation and cDNA synthesis were performed according to the manufacturer's instruction. Briefly, 5dpf larvae had their encephalon dissected (Figure 1A) (pool of 20 animals, N = 6 in duplicates) placed in TRIzol (Invitrogen), frozen in liquid nitrogen and maintained at –80°C. mRNA was isolated and cDNA were synthesized with SuperScriptIII First-Strand Synthesis SuperMix (Invitrogen).

For all genes, qRT-PCRs were performed using SYBR green dye [30]. Standard reactions were performed with a total 25  $\mu$ L per well, on an Applied Biosystems 7500 real-time PCR system, and the primer final concentration were 0.1  $\mu$ M. The primers sequences were described previously by Tang [30] for constitutive genes: b-actin1 F:5'-CGAGCTGTCTTCCCATCCA-3', R:5'-

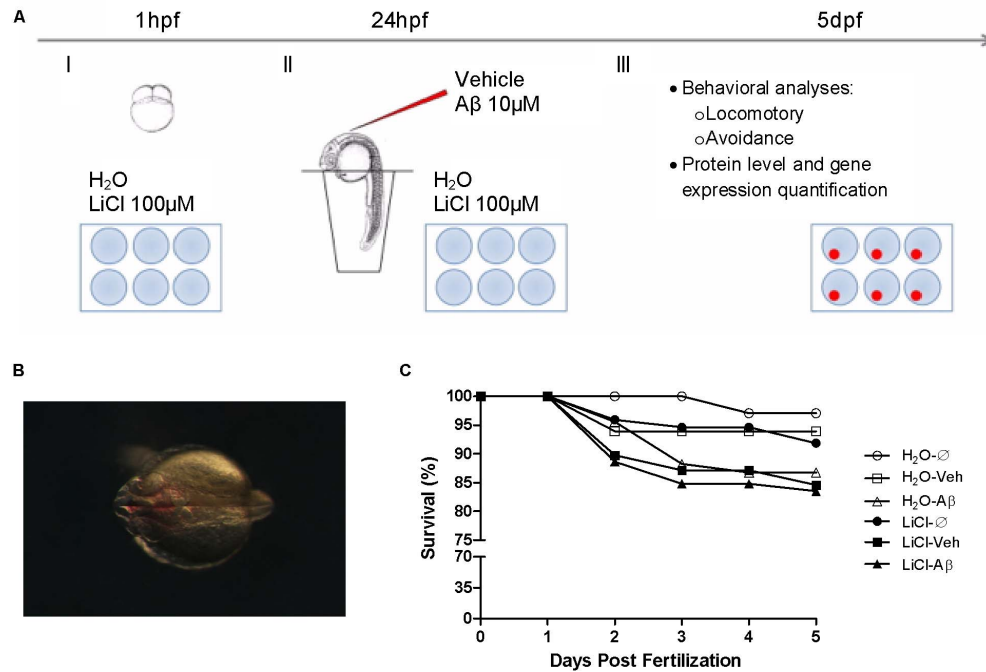

**Figure 1. Experimental design and A $\beta$  intraventricular injection effect on survival.** A, Experimental procedures time-line, (I) at 1 hpf embryos were placed in 6-well plates and exposed to LiCl 100  $\mu$ M or H<sub>2</sub>O; (II) at 24 hpf embryos were removed from their chorion, and injected with A $\beta$ 1-42 10  $\mu$ M or its vehicle; LiCl and H<sub>2</sub>O solutions were replaced daily throughout the experiment; (III) at 5 dpf larvae behavior were evaluated and samples for protein and gene expression quantification were obtained. B, Representative image of A $\beta$  (red) injected on the brain ventricle area. C, Kaplan-Meier survival comparison for all groups throughout the experiment showed significant effects (Log-rank (Mantel-Cox) test,  $p = 0.0415$ ,  $N = 60$  in triplicates) that were not statistically significant when individual comparisons were performed.  
doi:10.1371/journal.pone.0105862.g001

TCACC-AACGTZGCTGTCTTTCTG-3'; efla F:5'-CTGG-AGGCCAGCTCAAACAT-3', R:5'-ATCAAGAAGAGTAGT-ACCGCTAGCATTAC-3'; and rpl13a F:5'-TCT-GGAGGAC-TGTAAGAGGTATGC-3', R:5'-AGACGCACAATCTTGAG-AGCAG-3'. The target genes were previously described by Jung et al. [31]: p53 F:5'-CTATAAGAAGTCCGAGCATGTGG-3', R:5'-GGTTTTGGTCTCTTGGTCTTCT-3'; bax-a F:5'-GAGCTGCACTTCTCAACAACCTTT-3', R:5'-CTGGTTGAAATAG-CCTTGATGAC-3' and bcl-2 F:5'-TTGTGGAGAAATACCTCAAGCAT-3', R:5'-GAGTCTCTCTGCTGACCGTACAT-3'. Amplification and dissociation curves generated by the software were used for gene expression analysis.

Threshold Cycle (Ct) values were obtained for each gene. Following exclusion of non-amplifying samples, raw fluorescence data was exported to the software LinRegPCR 12.x to determine the PCR amplification efficiency of each sample. PCR efficiency of each sample, together with Ct values, was used to calculate a relative gene expression value for each transcript according to Pfaffi [32].

### Statistical analyses

Survival throughout the 5 experimental days was analyzed by Kaplan-Meier test. Data from all other approaches was parametrically analyzed using two-way ANOVA (using treatment and injection as factors) followed by Bonferroni post-hoc test. Student-t test was used to evaluate specific data when needed. The level of significance was considered  $p < 0.05$ .

### Results

First, we adapted Gutzman and Sive [27] protocol for 24 hpf zebrafish brain ventricle injection, and in addition to a dye tracer

to ensure correct injection positioning (Figure 1B), we injected animals with 10  $\mu$ M of soluble A $\beta$ 1-42 in 1% DMSO (A $\beta$ -injected group) or only 1% DMSO vehicle (veh-injected group) (Figure 1). To our knowledge, this is the first demonstration of ventricular brain A $\beta$  injection in zebrafish in addition to the dye used for validation. No morphological alteration or injection effect was observed in any of the evaluated parameters throughout the experiments. In addition to those injection groups, we also controlled the effects of the microinjection puncture and did not find any deleterious effect on survival, deformities or behavior (data not shown).

Survival rates were analyzed by Kaplan-Meier test and results indicated a significant difference on survival rate when all groups were compared (Log-rank (Mantel-Cox) test  $p = 0.0415$ ,  $N = 60$ ). The decrease in survival on H<sub>2</sub>O-A $\beta$  (86.7%), LiCl-veh (84.5%) and LiCl-A $\beta$  (83.5%) groups was not significant when individual comparisons were performed (Figure 1C). This effect is discrete and challenging to interpret since it was not homogeneously distributed among treatment or injection factors. It may be associated to the high and uniform within group survival rates from most groups (mean survival of H<sub>2</sub>O-treated non-injected individuals was 97.06%) in comparison to commonly observed values of around 75% in these developmental stages [33].

Considering that AD behavioral symptoms in early stages include only mild cognitive deficits, which are several times misdiagnosed and confounded with normal aging even though not accompanied by aging-characteristic motor deficits [6], we evaluated locomotion separately from cognitive behavior in 5 dpf larva. Individually locomotor evaluation and exploratory parameters showed no statistical differences between groups, including total distance travelled ( $p = 0.250$   $F_{(1,179)} = 1.40$ ), mean speed

( $p = 0.181$   $F_{(1,185)} = 1.72$ ), time spent mobile ( $p = 0.70$   $F_{(1,182)} = 0.36$ ) and path absolute turn angle, a motor coordination parameter [34], ( $p = 0.409$   $F_{(1,186)} = 0.90$ ) using two-way ANOVA (data not shown). However, when cognitive escaping responses from an aversive stimulus was evaluated, we observed a significant effect of A $\beta$ -injection and LiCl-treatment (two-way ANOVA  $p < 0.0001$   $F_{(1,166)} = 40.77$  on treatment effect, and  $p < 0.0001$   $F_{(2,166)} = 21.13$  on injection effect) (Figure 2). Bonferroni posttest showed that A $\beta$ -injected animals avoided the aversive stimulus less effectively than animals injected with vehicle on both treatments ( $p < 0.05$ ). When comparing only H<sub>2</sub>O-A $\beta$  and LiCl-A $\beta$  animals, LiCl significantly improved the scape response to the stimuli ( $p = 0.0002$ , Student-t test), suggesting protective effect from A $\beta$ -induced cognitive deficits. Additionally, the lithium beneficial effect on cognition was observed in all groups when compared to their respective water-treated controls.

To investigate if the selective cognitive deficits induced by A $\beta$  injection and prevented by LiCl were accompanied by tau phosphorylation, we measured the level of Ser202 and Thr205 phosphorylation (Figure 3). These residues are GSK-3 $\beta$  targets [11] [35] [36] known to be increased in aged individuals and early-stage AD patients [6]. Our results showed again significant effects of A $\beta$  injection and a general protective effect of the GSK-3 $\beta$  inhibitor LiCl (Two-way ANOVA  $p < 0.0001$ ;  $F_{(1,42)} = 296.00$  on treatment effect, and  $p < 0.0001$   $F_{(2,42)} = 11.77$  on injection effect) (Figure 3). Untreated A $\beta$ -injected animals (H<sub>2</sub>O-A $\beta$ ) displayed significantly higher levels of tau protein phosphorylation ( $p < 0.001$ , Bonferroni posttest) when compared to H<sub>2</sub>O-veh. H<sub>2</sub>O-veh animals also displayed increased p-tau in relation to non-injected animals (H<sub>2</sub>O- $\emptyset$ ) ( $p < 0.01$ , Bonferroni posttest), which may be attributed to DMSO toxicity even at very low concentrations. Interestingly, when LiCl-treated groups were paired with their respective H<sub>2</sub>O-treated equivalent groups, all comparisons showed a lithium significant effect decreasing tau-p levels ( $p < 0.0001$  for all groups; Student-t tests), which was more prominent between H<sub>2</sub>O-A $\beta$  and LiCl-A $\beta$ , in resemblance to the cognitive data (Figure 2). These protective effects of LiCl over the basal and A $\beta$ -induced phosphorylation have been previously shown in other systems [37] [38] [39] but not in zebrafish.

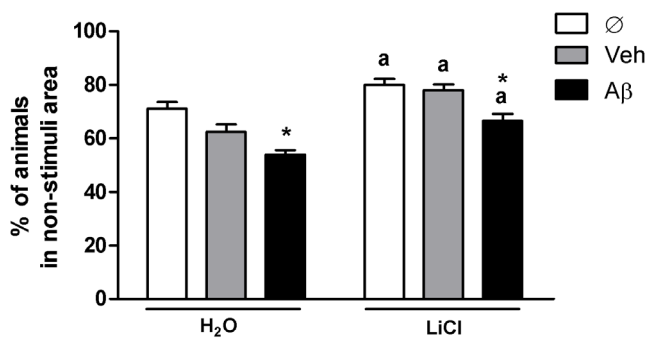

**Figure 2. Intraventricular A $\beta$  injection significantly impairs avoidance of an aversive stimulus.** 5dpf larvae escape behavior from an aversive stimulus (charts were plotted with means and SD escape responses to a non-stimuli area). Two-way ANOVA followed by Bonferroni demonstrated a significant effect of treatment factor (H<sub>2</sub>O and LiCl) ( $p < 0.0001$ ;  $F_{(1,166)} = 40.77$ ;  $N = 10$  in triplicates). A $\beta$  injected animals showed diminished escape responses when compared to their vehicle control group in H<sub>2</sub>O and LiCl-treated groups (\* indicates  $p < 0.05$  for both comparisons). LiCl treatment increased escape responses in all groups when compared to their respective H<sub>2</sub>O-treated equivalent (a indicates  $p < 0.05$  for noninjected  $\emptyset$  groups;  $p < 0.0001$  for veh-injected groups and  $p < 0.001$  for A $\beta$ -injected groups in Student-t test. doi:10.1371/journal.pone.0105862.g002

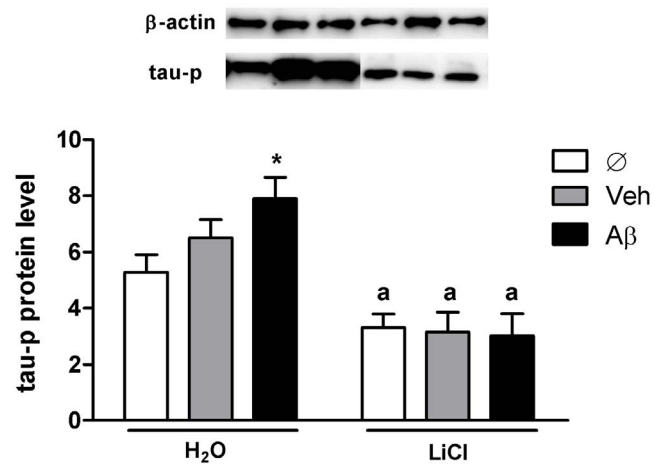

**Figure 3. Intraventricular A $\beta$  injection increases tau-p at Ser202 and Thr205 residues and this effect is reversed by lithium treatment.** Representative Western blots showing immunoreactivity to phosphorylated tau protein normalized to  $\beta$ -actin and quantification of absorbance (charts were plotted with means and SD). Two-way ANOVA followed by Bonferroni demonstrated a significant effect of treatment factor ( $p < 0.0001$ ,  $F_{(1,42)} = 296.02$ ;  $N = 3$  in triplicates). H<sub>2</sub>O-A $\beta$  injected animals showed increased levels of tau phosphorylation in relation to H<sub>2</sub>O-veh (\* $p < 0.001$ ). LiCl treatment decreased tau-p in all groups when compared to their respective H<sub>2</sub>O-treated equivalent (a indicates  $p < 0.0001$  in Student-t test for all comparisons). doi:10.1371/journal.pone.0105862.g003

Tau abnormal phosphorylation has been associated to AD progression, axonal disruption, synaptic loss and neuronal death (reviewed in [6]). A $\beta$ -induced effects on cognition (Figure 2) and tau-phosphorylation (Figure 3) suggested that our model resembles early AD stages that were not related with cell death. We quantified protein and transcription levels of apoptosis-associated proteins that were previously suggested to be associated to A $\beta$ -toxicity and neurodegeneration including p53, caspase-8, bax and non-apoptotic marker such as bcl-2 (Figure 4). Importantly, A $\beta$ -injected (H<sub>2</sub>O-A $\beta$ ) animals did not differ from their respective vehicle-injected controls (H<sub>2</sub>O-veh) or from LiCl-A $\beta$  animals in any comparison, suggesting no specific A $\beta$ -induced effect on apoptosis and associated LiCl neuroprotective effect. No alterations on bax ( $p = 0.3063$ ;  $F_{(2,48)} = 1.21$  Two-way ANOVA) protein level were observed despite of significant effects on p53 ( $p = 0.035$ ;  $F_{(1,41)} = 4.758$  Two-way ANOVA) and caspase-8 ( $p = 0.0114$ ;  $F_{(1,48)} = 6.916$  Two-way ANOVA) protein levels (Figure 4B) due to both H<sub>2</sub>O-A $\beta$  and H<sub>2</sub>O-veh higher protein levels regarding H<sub>2</sub>O- $\emptyset$  animals ( $p < 0.01$  and  $p < 0.05$  respectively; Bonferroni posttest). These effects likely result from DMSO toxic effects [40]. Surprisingly, non-injected LiCl-treated animals showed higher levels of these same proteins when compared to their H<sub>2</sub>O- $\emptyset$  controls ( $p < 0.01$  for both comparisons, Student-t tests). Messenger RNA levels of p53, bax and bcl-2 were not altered ( $p = 0.5473$   $F_{(1,88)} = 0.6069$ ;  $p = 0.7313$   $F_{(1,48)} = 0.3149$ ;  $p = 0.8822$   $F_{(1,50)} = 0.1257$  respectively) (Figure 4C). These results suggest a scenario with undetectable alterations on apoptotic-associated proteins that may also resemble early stages of AD.

## Discussion

Early AD stages, usually misdiagnosed and confounded with aging associated symptoms, are characterized by subtle cognitive deficits, rising brain A $\beta$  levels that progressively diffuse and oligomerize until aggregation in fibrils, and tau altered phosphorylation [1] [6] [41].

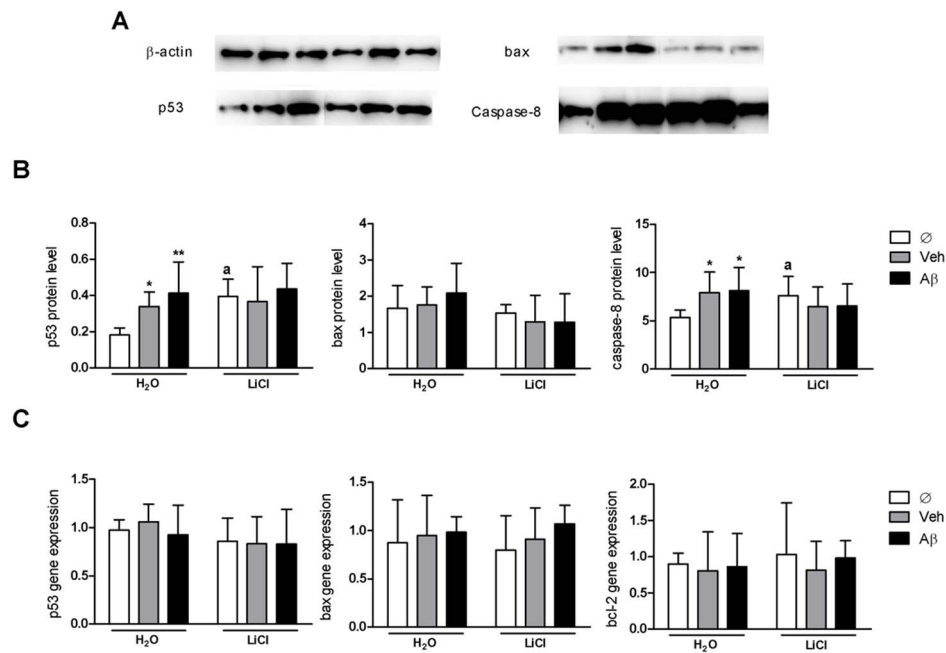

**Figure 4. Intraventricular injection alters apoptotic targets.** A, representative Western blots showing immunoreactivity of indicated proteins normalized to  $\beta$ -actin. B, Western blots quantification of absorbance (charts were plotted with means and SD). Two-way ANOVA followed by Bonferroni posttest didn't show significant differences ( $p=0.1153$ ,  $F_{(2,41)}=2.28$  for p53;  $p=0.3063$ ,  $F_{(2,48)}=1.21$  for bax;  $p=0.4420$ ,  $F_{(2,45)}=0.83$  for caspase-8;  $N=3$  in triplicates) in A $\beta$  injected animals compared to their vehicle control group in H<sub>2</sub>O or LiCl-treated groups. P53 and caspase-8 levels differed between H<sub>2</sub>O-veh and H<sub>2</sub>O-A $\beta$  and noninjected H<sub>2</sub>O- $\emptyset$  controls ( $*p<0.05$ ,  $**p<0.01$ ). Among noninjected animals, LiCl treatment increased p53 and caspase-8 protein levels compared to their respective H<sub>2</sub>O-treated equivalent (a indicates  $p<0.01$  for caspase-8 and  $p<0.0001$  for p53 in Student-t test). C, q-PCR analysis normalized to three constitutive genes (b-actin, rpl13a and ef1a) (charts were plotted with means and SD). Two-way ANOVA followed by Bonferroni posttest didn't show significant differences on gene expression ( $p=0.5473$ ,  $F_{(2,88)}=0.61$  for p53;  $p=0.7313$ ,  $F_{(2,48)}=0.31$  for bax;  $p=0.8822$ ,  $F_{(2,50)}=0.13$  for bcl-2;  $N=6$  in duplicates). doi:10.1371/journal.pone.0105862.g004

The absence of robust biomarkers for early diagnosis of AD is a major impediment for cost-effective and successful clinical trials of potential agents that could significantly slow or even prevent disease progression.

We established a straightforward low-cost platform for both biomarker identification and high-throughput preclinical pharmacological screenings in a prominent model organism. In the last decade zebrafish has emerged as a powerful model for drug screenings, genetic studies and disease modeling [22] [42]. In addition to the significant genetic similarity to humans, homologue genes encoding several proteins related to AD were identified [20] [21] [42], including the amyloid precursor protein (APP) with 80% of conservation [20]. This is the first report of A $\beta$  brain injection in zebrafish, in parallel to Cunvong et al. [28] that injected the same peptide in the retina and Cameron et al. [43] that exposed embryos to amyloid- $\beta$  1–42 in the water. The original brain ventricle microinjection protocol from Gutzman and Sive [27] for 24 hpf zebrafish embryos was adapted and proved feasible in large scale, requiring a relatively accessible setup in which trained experimenters injected one embryo every 10 minutes, with no impact on animals survival.

Our behavioral results showed specific cognitive deficits in animals injected with A $\beta$  peptide, which corroborates with findings in rodent that correlate A $\beta$  peptide accumulation and memory impairment [44] [45] [46]. Several studies correlate A $\beta$ -induced cognitive impairments with GSK-3 $\beta$  phosphorylation of tau protein residues resulting in cytoskeletal disorganization, synaptic loss and axonal disruption [8] [10]. We quantified the amount of early-phosphorylated tau protein and observed an increase on GSK-3 $\beta$  target residues Ser202 and Thr205 on

animals injected with A $\beta$  that was reversed by continuous 5dpf lithium exposure. Interestingly, LiCl had positive effects *per se* on cognition and tau basal phosphorylation that support its traditional view as a neuroprotective agent in low doses, with beneficial effects on memory [47] [48], long-term potentiation (LTP) [49] and tau phosphorylation [12] [50]. Those effects may be a result of basal GSK-3 $\beta$  activity inhibition, as suggested by Noble et al. [50] when observing reduced markers of tauopathy in transgenic mice after lithium. Maguschak and Ressler [51] also used mice to demonstrate a lithium-induced  $\beta$ -catenin increase associated to improved memory formation.

Magdesian and collaborators [9] reported that A $\beta$  binds to Wnt receptor Frizzled inhibiting the Wnt canonical signaling pathway and therefore permitting GSK-3 $\beta$  activity. In corroboration with other studies [10] [11] [50] our results suggest that A $\beta$  is associated with tau-increased phosphorylation by GSK-3 $\beta$ , reinforcing the therapeutic potential of GSK-3 $\beta$  inhibitors [12].

Compatible with an early AD scenario, we did not observe any specific effect of A $\beta$  over protein and gene expression levels associated with apoptosis when A $\beta$ -injected group was compared to its vehicle-injected controls. We found, however, an increase on p53 and caspase-8 protein levels on both injected groups (vehicle and A $\beta$ ) when compared to non-injected animals, which could be attributed to vehicle components [52] [53] [54]. Hanslick et al. [40] showed that DMSO has an apoptotic effect on mice developing central nervous system exposed to LiCl during the postnatal developmental stages. Surprisingly, our data also showed that lithium treated animals also have increased p53 and caspase-8 when compared to untreated non-injected animals. It is known that both apoptosis [55] and tau-phosphorylation in those residues



[56] occur naturally during development and aging. It is also known that LiCl treatment can play different roles depending on cell type, system and developmental stage [57] [58] [59] [60]. In a developmental changing scenario, where neuron pathways are being formed and connection refinement is necessary [55], opposing effects on apoptotic pathways may be observed. In summary, we showed that A $\beta$ 1-42 injection in the ventricular region of 24 hpf zebrafish embryos induce cognitive deficits and an increase in tau phosphorylation, which were reversed by lithium incubation. We were not able to identify apoptosis and neurofibrillary tangles in animals submitted to this procedure at 5dpf and subsequent studies using this system should aim to

characterize other cellular processes and molecular targets. We believe our model may represent a straightforward platform useful to identify mechanisms resembling early stage AD and the effect of neuroactive molecules in pharmacological screenings.

## Author Contributions

Conceived and designed the experiments: LRN VMS CDB MRV. Performed the experiments: LRN NSE CH RF SA HNG. Analyzed the data: LRN SA VMS MRV. Contributed reagents/materials/analysis tools: VMS CDB MRV. Wrote the paper: LRN VMS CDB MRV.

## References

- Holtzman DM, Morris JC, Goate AM (2011) Alzheimer's disease: The challenge of the second century. *Sci Transl Med* 3: 77sr1.
- Golde TE, Eckman CB, Younkin SG (2000) Biochemical detection of Abeta isoforms: implications for pathogenesis, diagnosis, and treatment of Alzheimer's disease. *Biochim Biophys Acta* 1502: 172–187.
- Hoover BR, Reed MN, Su J, Penrod RD, Kotilinek LA, et al. (2010) Tau mislocalization to dendritic spines mediates synaptic dysfunction independently of neurodegeneration. *Neuron* 68: 1067–1081.
- Campioni S, Mannini B, Zampagni M, Pensalfini A, Parrini C, et al. (2010) A causative link between the structure of aberrant protein oligomers and their toxicity. *Nat Chem Biol* 6: 140–147.
- Mc Donald JM, Savva GM, Brayne C, Welzel AT, Forster G, et al. (2010) The presence of sodium dodecyl sulphate-stable Abeta dimers is strongly associated with Alzheimer-type dementia. *Brain* 133: 1328–1341.
- Selkoe DJ (2011) Resolving controversies on the path to Alzheimer's therapeutics. *Nat Med* 17: 1060–1065.
- Benilova I, Karran E, De Strooper B (2012) The toxic A $\beta$  oligomer and Alzheimer's disease: an emperor in need of clothes. *Nat Neurosci* 3: 349–357.
- Mazanetz MP, Fischer PM (2007) Untangling tau hyperphosphorylation in drug design for neurodegenerative disease. *Nat Rev Drug Discov* 6: 464–479.
- Magdesian MH, Carvalho MMVF, Mendes FA, Saraiva LM, Juliano MA, et al. (2008) Amyloid- $\beta$  binds to the extracellular cysteine-rich domain of frizzled and inhibits wnt/ $\beta$ -catenin signaling. *J Biol Chem* 283: 9359–9368.
- Sakono M, Zaco T (2010) Amyloid oligomers: formation and toxicity of A $\beta$  oligomers. *FEBS J* 277: 1348–1358.
- Shipton OA, Leitz JR, Dworzak J, Acton CEJ, Tunbridge EM, et al. (2011) Tau protein is required for Amyloid  $\beta$ -induced impairment of hippocampal long-term potentiation. *J Neurosci* 31: 1688–1692.
- Kramer T, Schmidt B, Lo Monte F (2012) Small-molecule inhibitors of GSK-3: Structural insights and their application to Alzheimer's Disease models. *Int J Alzheimers Dis* 2012: 381029.
- Forlenza OV, Torres CA, Talib LL, de Paula VJ, Joaquim HPG, et al. (2011) Increased platelet GSK3B activity in patients with mild cognitive impairment and Alzheimer's disease. *J Psychiatr Res* 45: 220–224.
- Harkany T, O'Mahony S, Kelly JP, Soós K, Törö I, et al. (1998) Amyloid (Phe(SO<sub>3</sub>H)<sub>24</sub>)<sub>25–35</sub> in rat nucleus basalis induces behavioral dysfunction, impairs learning and memory and disrupts cortical cholinergic innervation. *Behav Brain Res* 90: 133–145.
- Yamada M, Chiba T, Sasabe J, Nawa M, Tajima H, et al. (2005) Implanted cannula-mediated repetitive administration of A $\beta$ -25–35 into the mouse cerebral ventricle effectively impairs spatial working memory. *Behav Brain Res* 474: 86–93.
- Van Dam D, De Deyn PP (2011) Animal models in the drug discovery pipeline for Alzheimer's disease. *Br J Pharmacol* 164: 1285–1300.
- Lenz S, Karsten P, Schulz JB, Voigt A (2013) Drosophila as a screening tool to study human neurodegenerative diseases. *J Neurochem* 127: 453–460.
- Li J, Le W (2013) Modeling neurodegenerative diseases in *Caenorhabditis elegans*. *Exp Neurol* 250: 94–103.
- Jenkins JL, Urban L (2010) Phenotypic screening: Fishing for neuroactive compounds. *Nat Chem Biol* 6: 172–173.
- Xia W (2010) Exploring Alzheimer's disease in zebrafish. *J Alzheimers Dis* 20: 981–990.
- Newman M, Verdile G, Martins RN, Lardelli M (2011) Zebrafish as a tool in Alzheimer's disease research. *Biochim Biophys Acta* 1812: 346–352.
- Xi Y, Noble S, Ekker M (2011) Modeling neurodegeneration in zebrafish. *Curr Neurol Neurosci Rep* 11: 274–282.
- Howe K, Clark MD, Torroja CF, Torrance J, Berthelot C, et al. (2013) The zebrafish reference genome sequence and its relationship to the human genome. *Nature* 496: 498–503.
- Westerfield M (2000) The zebrafish book. A guide for the laboratory use of zebrafish (*Danio rerio*). Eugene: University of Oregon Press.
- CCAC guidelines on the care and use of fish in research, teaching and testing. (2005) Ottawa: Canadian Council on Animal Care 94p.
- Paquet D, Bhat R, Sydow A, Mandelkow E, Berg S, et al. (2009) A zebrafish model of tauopathy allows in vivo imaging of neuronal cell death and drug evaluation. *J Clin Invest* 119: 1382–1395.
- Gutzman JH, Sive H (2009) Zebrafish Brain Ventricle Injection. *J Vis Exp* 26:e1218, doi:10.3791/1218.
- Cunvong K, Huffmire D, Ethell DW, Cameron DJ (2013) Amyloid- $\beta$  increases capillary bed density in the adult zebrafish retina. *Invest Ophthalmol Vis Sci* 54: 1516–1521.
- Pelkowski SD, Kapoor M, Richendrer HA, Wang X, Colwill RM, et al. (2011) A novel high-throughput imaging system for automater analyses of avoidance behavior in zebrafish larvae. *Behav Brain Res* 223: 135–144.
- Tang R, Dodd A, Lai D, McNabb W, Love D (2007) Validation of Zebrafish (*Danio rerio*) reference genes for quantitative real-time RT-PCR normalization. *Acta Biochim Biophys Sin* 38: 384–90.
- Jung H, Kim TH, Lee CR, Seok SH, Park JH, et al. (2011) Effect of fluorescent whitening agent on the transcription of cell damage-related genes in zebrafish embryos. *J Appl Toxicol* 32: 654–661.
- Pfaffi MW (2001) A new mathematical model for relative quantification in real-time PT-PCR. *Nucleic Acid Res* 29: 2003–2007.
- Frayssé B, Mons R, Garric J (2006) Development of a zebrafish 4-day embryonal bioassay to assess toxicity of chemicals. *Ecotoxicol Environ Saf* 63: 253–267.
- Blazina AR, Vianna MR, Lara DR (2013) The Spinning Task: A New Protocol to Easily Assess Motor Coordination and Resistance in Zebrafish. *Zebrafish* 10: 480–485.
- Rankin CA, Sun Q, Gamblin C (2005) Pseudo-phosphorylation of tau at Ser202 and Thr205 affects tau filament formation. *Mol Brain Res* 138: 84–93.
- Liu F, Liang Z, Shi J, Yin D, El-Akkad E, et al. (2006) PKA modulates GSK-3 $\beta$  and cdk5-catalyzed phosphorylation of tau in site- and kinase-specific manners. *FEBS Lett* 580: 6269–6274.
- Leng Y, Liang M, Ren M, Marinova Z, Leeds P, et al. (2008) Synergistic neuroprotective effects of lithium and valproic acid or other histone deacetylase inhibitors in neurons: roles of glycogen synthase kinase-3. *J Neurosci* 28: 2576–2588.
- Brunden KR, Trojanowski JQ, Lee VMY (2009) Advances in tau-focused drug discovery for Alzheimer's disease and related tauopathies. *Nat Rev Drug Discov* 8: 783–793.
- Shahpasand K, Uemura I, Saito T, Asano T, Hata K, et al. (2012) Regulation of Mitochondrial Transport and Inter-Microtubule Spacing by Tau Phosphorylation at the Sites Hyperphosphorylated in Alzheimer's Disease. *J Neurosci* 32: 2430–2441.
- Hanslick JL, Lau K, Noguchi KK, Olney JW, Zorumski CF, et al. (2009) Dimethyl sulfoxide (DMSO) produces widespread apoptosis in the developing central nervous system. *Neurobiol Dis* 34: 1–10.
- Dumurgier J, Gabelle A, Vercurysse O, Bombois S, Laplanche JL, et al. (2013) Exacerbated CSF abnormalities in younger patients with Alzheimer's disease. *Neurobiol Dis* 54: 486–491.
- Paquet D, Schmid B, Haass C (2010) Transgenic zebrafish as a novel animal model to study tauopathies and other neurodegenerative disorders in vivo. *Neurodegener Dis* 7: 99–102.
- Cameron DJ, Galvin C, Alkam T, Sidhu H, Ellison J, et al. (2012) Alzheimer's-related peptide amyloid- $\beta$  plays a conserved role in angiogenesis. *PLoS One* 7:e39598.
- Cleary JP, Walsh DM, Hofmeister JJ, Shankar GM, Kuskowski MA, et al. (2005) Natural oligomers of the amyloid- $\beta$  protein specifically disrupt cognitive function. *Nat Neurosci* 8: 79–84.
- Lesne S, Koh MT, Kotilinek L, Kaye R, Glabe CG, et al. (2006) A specific amyloid- $\beta$  protein assembly in the brain impairs memory. *Nat Letter* 440: 352–357.
- Shankar MG, Li S, Mehta TH, Garcia-Munoz A, Shepardson NE, et al. (2008) Amyloid- $\beta$  protein dimers isolated directly from Alzheimer's brains impairs synaptic plasticity and memory. *Nat Med* 14: 837–842.
- Nocjar C, Hammonds MD, Shim SS (2007) Chronic lithium treatment magnifies learning in rats. *Neurosci* 150: 774–788.

48. Wu YY, Wang X, Tan L, Liu D, Liu XH, et al. (2013) Lithium Attenuates Scopolamine-Induced Memory Deficits with Inhibition of GSK-3 $\beta$  and Preservation of Postsynaptic Components. *J Alzheimers Dis* 37: 515–527.
49. Voytovich H, Kriváneková L, Ziemann U (2012) Lithium: A switch from LTD- to LTP-like plasticity in human cortex. *Neuropharma* 63: 274–279.
50. Noble W, Planel E, Zehr C, Olm V, Meyerson J, et al. (2005) Inhibition of glycogen synthase kinase-3 by lithium correlates with reduced tauopathy and degeneration *in vivo*. *Proc Natl Acad Sci U S A* 102: 6990–6995.
51. Maguschak KA, Ressler KJ (2008) beta-catenin is required for memory consolidation. *Nat Neurosci* 11: 1319–1326.
52. Ryan JJ, Clarke MF (1994) Alteration of p53 conformation and induction of apoptosis in a murine erythroleukemia cell line by dimethylsulfoxide. *Leuk Res* 18: 617–621.
53. Liu J, Yoshikawa H, Nakajima Y, Tasaka K (2001) Involvement of mitochondrial permeability transition and caspase-9 activation in dimethyl sulfoxide-induced apoptosis of EL-4 lymphoma cells. *Int Immunopharmacol* 1: 63–74.
54. Santos NC, Figueira-Coelho J, Martins-Silva J, Saldanha C (2003) Multidisciplinary utilization of dimethyl sulfoxide: pharmacological, cellular, and molecular aspects. *Biochem Pharmacol* 65: 1035–1041.
55. Cole LK, Ross LS (2001) Apoptosis in the Developing Zebrafish Embryo. *Dev Biol* 240: 123–142.
56. Yu Y, Run X, Liang Z, Li Y, Liu F, et al. (2009) Developmental regulation of tau phosphorylation, tau kinases, and tau phosphatases. *J Neurochem* 108: 1480–1494.
57. D'Mello SR, Anelli R, Calissano P (1994) Lithium induces apoptosis in immature cerebellar granule cells but promotes survival of mature neurons. *Exp Cell Res* 211: 332–8.
58. van Gijn ME, Snel F, Cleutjens JP, Smits JF, Blankesteyn WM (2001) Overexpression of components of the Frizzled-Dishevelled cascade results in apoptotic cell death, mediated by beta-catenin. *Exp Cell Res* 265: 46–53.
59. Zhang WV, Jüllig M, Connolly AR, Stott NS (2005) Early gene response in lithium chloride induced apoptosis. *Apoptosis* 10: 75–90.
60. Matsebalela T, Gallicchio V, Becker R (2012) Lithium modulates cancer cell growth, apoptosis, gene expression and cytokine production in HL-60 promyelocytic leukaemia cells and their drug-resistant sub-clones. *Biol Trace Elem Res* 149: 323–330.
